# Supplementary material
Source: publisher figshare collection journal article supplement (https://acs.figshare.com/ndownloader/files/3855175)
Supplement: Supplementary file 1 [file 3855175]

## SUPPORTING INFORMATION

# Targeted decationized polyplexes for siRNA delivery

*Novo<sup>a</sup>, Kaori M. Takeda<sup>b</sup>, Tamara Petteta<sup>a</sup>, George R. Dakwar<sup>c</sup>, Joep B. van den Dikkenberg<sup>a</sup>,  
Katrien Remaut<sup>c</sup>, Kevin Braeckmans<sup>c,d</sup>, Cornelius F. van Nostrum<sup>a</sup>, Enrico Mastrobattista<sup>a</sup>, Wim  
E. Hennink<sup>a\*</sup>*

<sup>a</sup>Department of Pharmaceutics, Utrecht Institute for Pharmaceutical Sciences, Utrecht University, 3584 CG Utrecht, The Netherlands

<sup>b</sup>Department of Materials Engineering, Graduate School of Engineering, The University of Tokyo, 7-3-1 Hongo, Bunkyo-ku, Tokyo 113-8656, Japan

<sup>c</sup>Laboratory for General Biochemistry and Physical Pharmacy, Faculty of Pharmacy, Ghent University, Ghent Research Group on Nanomedicines, Harelbekestraat 72, 9000 Ghent, Belgium

<sup>d</sup>Centre for Nano- and Biophotonics, Ghent University, Harelbekestraat 72, 9000 Ghent, Belgium

\* Corresponding author. Tel.: +31 30 253 6964; fax: +31 30 251 7839. E-mail address: [w.e.hennink@uu.nl](mailto:w.e.hennink@uu.nl) (W.E. Hennink).

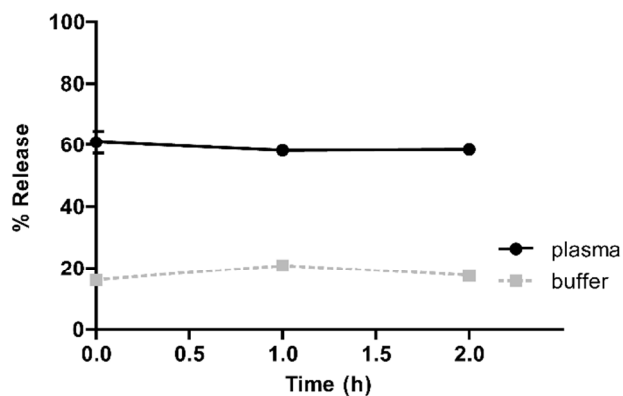

**Figure S1.** Time dependent siRNA released from decationized pHP-PEG-FA polyplexes when incubated in human plasma or 20 mM HEPES buffer pH 7.4, as measured by FCS. Results are expressed as mean $\pm$ SD (n=3).

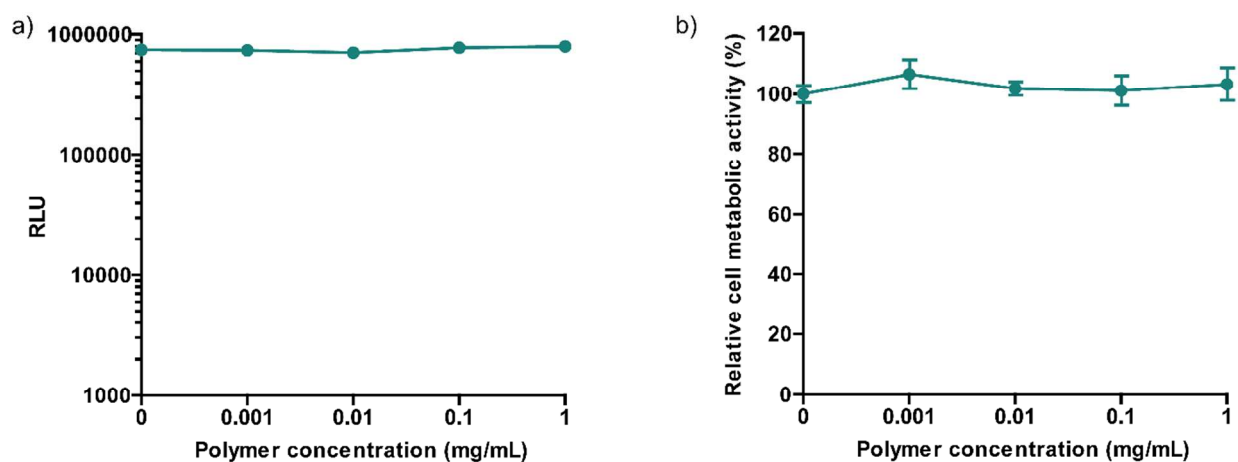

**Figure S2.** Luciferase expression (a) and relative metabolic activity determined by XTT (b) of Skov3-luc cells upon treatment decationized pHP-PEG-FA polymer at different concentrations. XTT results were normalized to buffer treated samples. Results are expressed as mean $\pm$ SD (n=5).

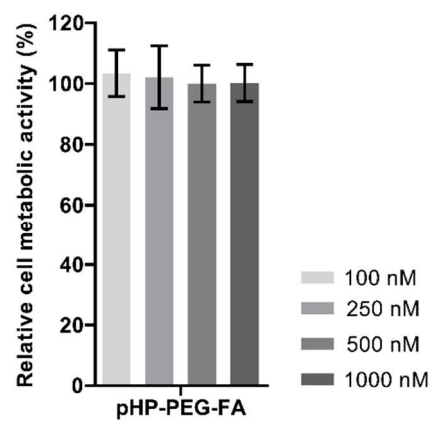

**Figure S3.** Relative metabolic activity determined by XTT of Skov3-luc cells upon treatment decationized pHP-PEG-FA polyplexes at different concentrations. Results were normalized to buffer treated samples. Results are expressed as mean $\pm$ SD (n=5).
